# Supplementary material for: No Racial Differences in the Association of Glycated Hemoglobin With Kidney Disease and Cardiovascular Outcomes
Source: Oxford University Press journal article supplement (doi:10.2337/dc12-2715), 2013-05-31
Supplement: dc122715supplementarydata.pdf [file dc122715supplementarydata.pdf]

SUPPLEMENTARY DATA

**Supplementary Figure 1.** Black-compared-to-white (interaction) relative hazard ratios\* and 95% CIs for the associations of HbA1c and fasting glucose modeled continuously (per one standard deviation) with incident kidney disease according to different case definitions. ■ = HbA1c (per 0.62%-point); ○ = Fasting glucose category (per 18.6 mg/dL).

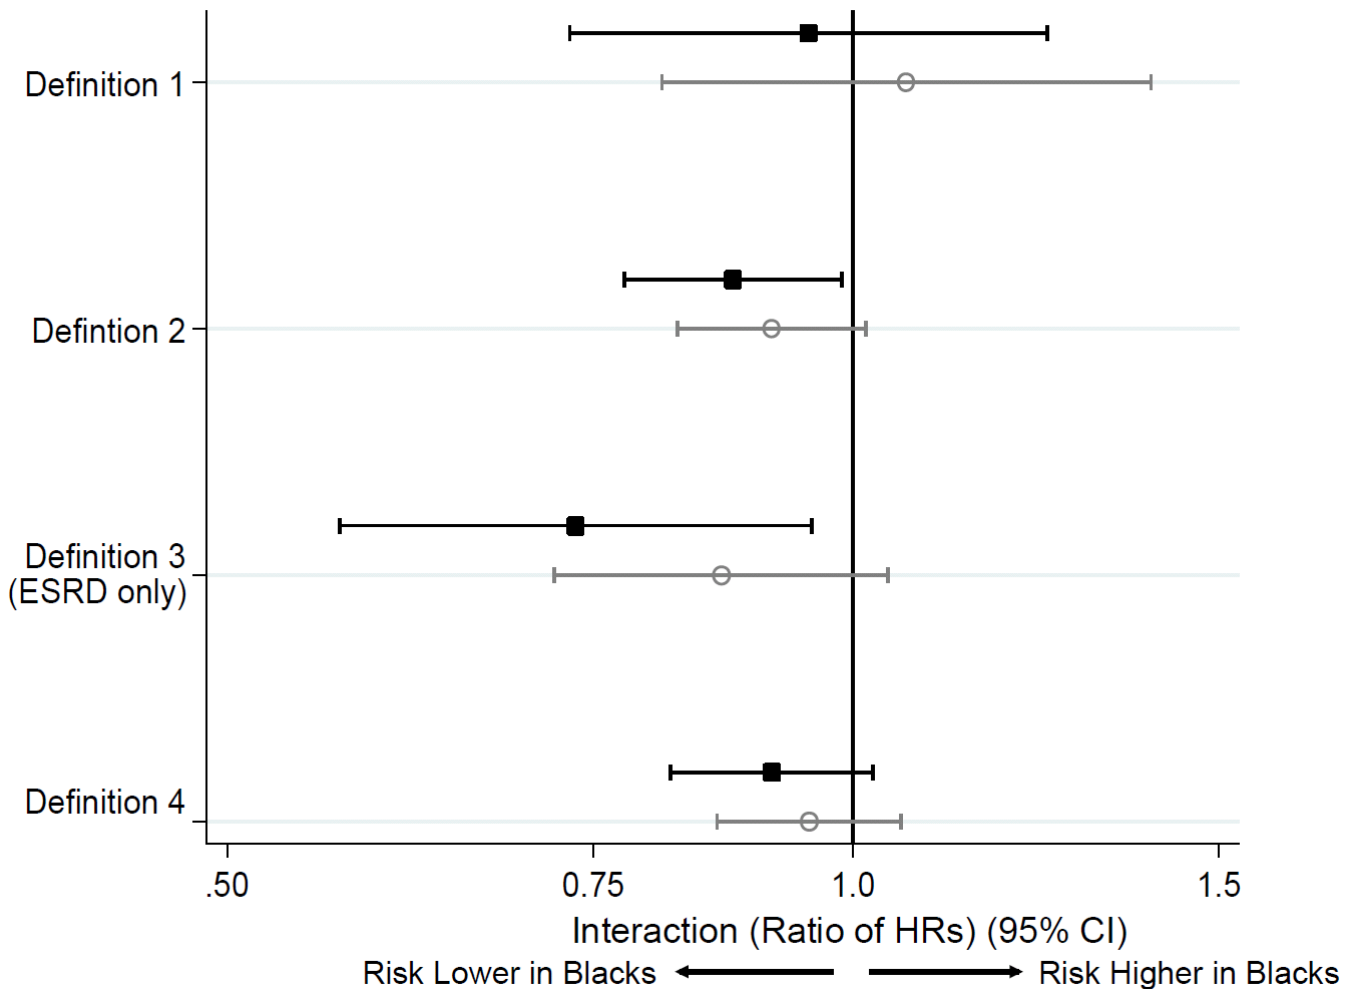

\*Adjusted for age, sex, black race, LDL cholesterol (mg/dL), HDL cholesterol (mg/dL), log-transformed triglycerides (mg/dL), body mass index (kg/m<sup>2</sup>), waist-to-hip ratio, hypertension (yes/no), family history of diabetes (yes/no), education (less than high school, high school or equivalent, or college or above), alcohol use (current, former, never), physical activity index, and smoking status (current, former, never). Values are per one standard deviation: 0.62-% points for HbA1c, and 18.6 mg/dL for fasting glucose. Definition 1: Baseline estimated GFR<sub>CKD-EPI</sub> ≥ 60 and at least one follow-up estimated GFR<sub>CKD-EPI</sub> < 60 mL/min/1.73m<sup>2</sup>. Definition 2: Hospitalization or CKD-related death from surveillance data up to 2008. Definition 3: ESRD only (subset of definition 2). Includes persons with AKI as an underlying cause of death and with a prior history of CKD as indicated by creatinine rise, estimated GFR or surveillance ICD code, and those with ICD codes specified for kidney transplant, dialysis or procedural code indicating dialysis. Definition 4: Combination of definitions 1 and 2 (main analysis).

SUPPLEMENTARY DATA

**Supplementary Figure 2.** Black-compared-to-white (interaction) relative hazard ratios\* and 95% CIs for the associations of HbA1c and fasting glucose with each clinical outcome, comparing highest group to lowest (■ : HbA1c: <5.7 vs ≥ 6.5%; O : Fasting glucose: <100 vs ≥ 126 mg/dL).

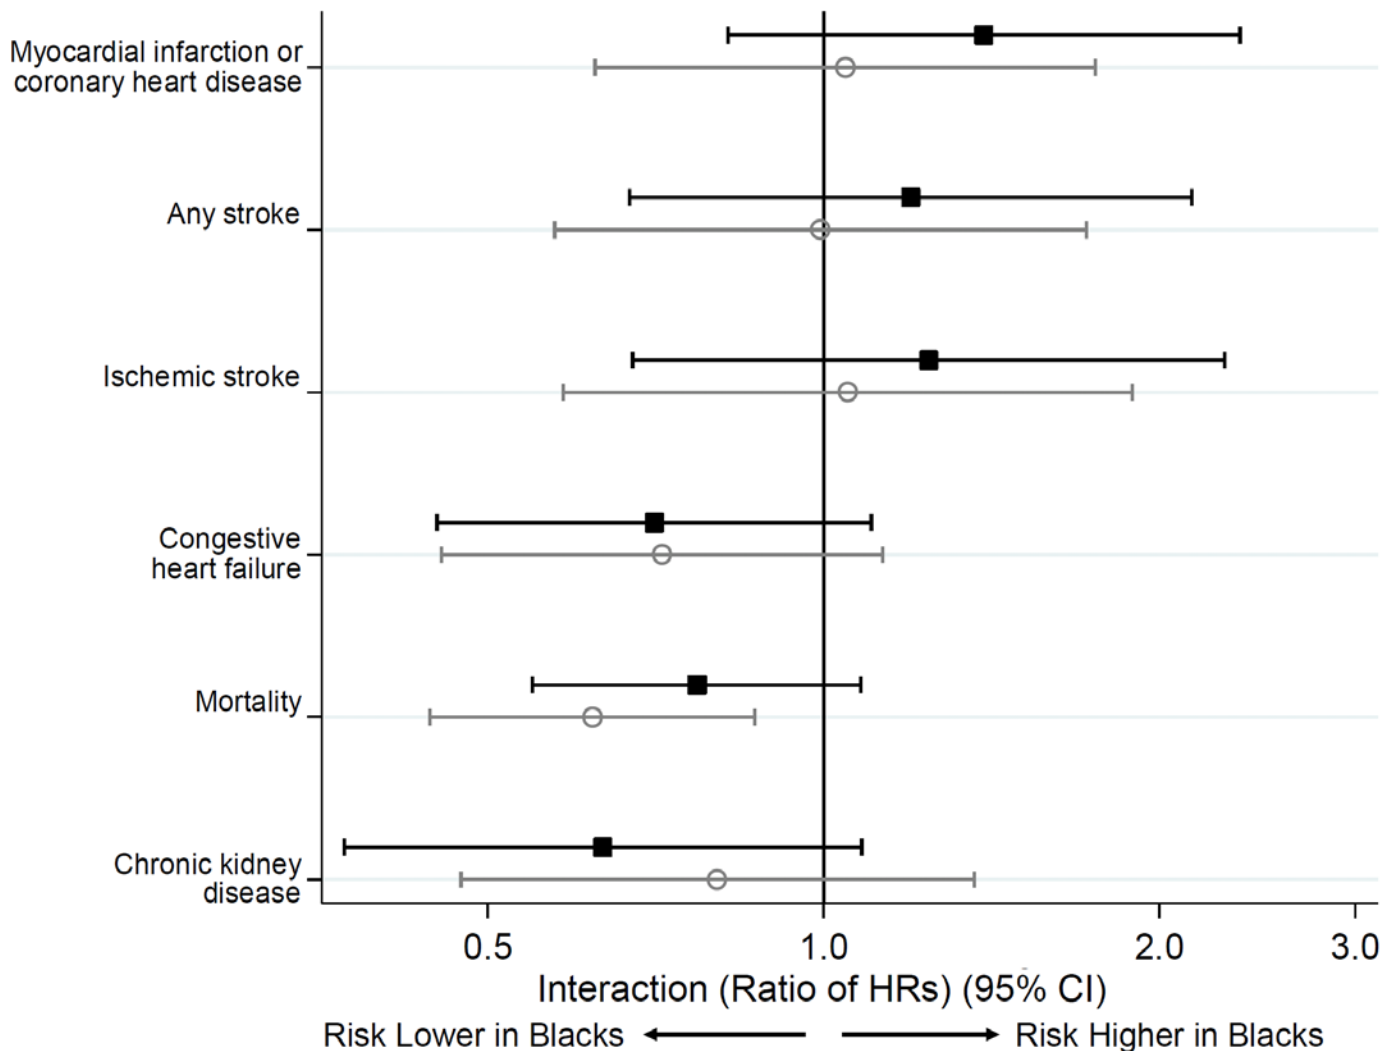

\*Adjusted for age, sex, black race, LDL cholesterol (mg/dL), HDL cholesterol (mg/dL), log-transformed triglycerides (mg/dL), body mass index (kg/m<sup>2</sup>), waist-to-hip ratio, hypertension (yes/no), family history of diabetes (yes/no), education (less than high school, high school or equivalent, or college or above), alcohol use (current, former, never), physical activity index, and smoking status (current, former, never).
